# Supplementary material
Source: MDPI journal article supplement (https://www.mdpi.com/2571-8800/6/1/6)
Supplement: s1 [file s1]

# **Reducing the immunogenicity of pulchellin A-chain, ribosome-inactivating protein type 2, by computational protein engineering for potential new immunotoxins**

Reza Maleki<sup>1</sup>, Libing Fu<sup>2</sup>, Ricardo Sobhie Diaz<sup>3</sup>, Francisco Eduardo Gontijo Guimarães<sup>4</sup>, Otávio Cabral-Marques<sup>5,6,7,8</sup>, Gustavo Cabral-Miranda<sup>\*5,9</sup>, Mohammad Sadraeian<sup>\*2</sup>

<sup>1</sup> Adelaide Medical School, University of Adelaide, Adelaide, SA, Australia.

<sup>2</sup> Institute for Biomedical Materials and Devices (IBMD), Faculty of Science, University of Technology Sydney, Sydney, NSW 2007, Australia

<sup>3</sup> Laboratório de Retrovirologia, Escola Paulista de Medicina, Universidade Federal de São Paulo, São Paulo 04039-032, SP, Brazil

<sup>4</sup> Instituto de Física de São Carlos, Universidade de São Paulo, Caixa Postal 369, São Carlos, SP, CEP 13560-970, Brazil

<sup>5</sup> Department of Immunology, Institute of Biomedical Sciences, University of São Paulo (ICB/USP), São Paulo 05508000, SP, Brazil

<sup>6</sup> Department of Clinical and Toxicological Analyses, School of Pharmaceutical Sciences, University of São Paulo, São Paulo, SP, Brazil.

<sup>7</sup> Laboratory of Medical Investigation in Pathogenesis and Directed Therapy in Onco-Immuno-Hematology (LIM-31), Department of Hematology and Cell Therapy, Hospital das Clínicas HCFMUSP, University of São Paulo, São Paulo, Brazil.

<sup>8</sup> Interunit Post Graduate Program on Bioinformatics, Institute of Mathematics and Statistics (IME), University of São Paulo (USP), São Paulo, SP, Brazil.

<sup>9</sup> Institute of Research and Education in Child Health (PENSI), São Paulo 01228200, SP, Brazil

## **\* Corresponding authors:**

Gustavo Cabral-Miranda, email: [gcabral.miranda@usp.br](mailto:gcabral.miranda@usp.br), +55(11)3091-7206

Mohammad Sadraeian, email: [mohammad.sadraeian@uts.edu.au](mailto:mohammad.sadraeian@uts.edu.au), +61-431963783

## **\* Current addresses:**

Department of Immunology, Institute of Biomedical Sciences, University of São Paulo, São Paulo 05508000, SP, Brazil

Institute for Biomedical Materials and Devices (IBMD), Faculty of Science, University of Technology Sydney, Sydney, NSW 2007, Australia

## Supplementary Materials

| Modeling servers                        | Verify3D (%)<br>of the residues had<br>an averaged 3D1D<br>score $\geq 0.2$ | ERRAT<br>Overall<br>Quality<br>Factor | ProSA-WEB<br>ZScore | Ramachandran Plot (%)<br>Favored(F)<br>additionally allowed (AA)<br>generously allowed (GA)<br>disallowed(D) |                  |
|-----------------------------------------|-----------------------------------------------------------------------------|---------------------------------------|---------------------|--------------------------------------------------------------------------------------------------------------|------------------|
| Galaxy<br>(100% Amino acid<br>Coverage) |                                                                             |                                       |                     |                                                                                                              |                  |
| Model 1                                 | 98.01 %                                                                     | 96.69                                 | -7.59               | F=93.9<br>GA=0.0                                                                                             | AA=5.7<br>D=0.4  |
| Model 2                                 | 97.61 %                                                                     | 95.06                                 | -7.55               | F= 94.7<br>GA=0.0                                                                                            | AA=4.8<br>D=0.4  |
| Model 3                                 | 96.70 %                                                                     | 96.70                                 | -7.63               | F= 93.4<br>GA= 0.4                                                                                           | AA=5.7<br>D=0.4  |
| Model 4*                                | 98.01 %                                                                     | 95.88                                 | -7.61               | F=94.7<br>GA= 0.0                                                                                            | AA=4.8<br>D=0.4  |
| Model 5                                 | 98.41 %                                                                     | 95.88                                 | -7.57               | F= 93<br>GA=0.0                                                                                              | AA=6.6<br>D=0.4  |
| I-TASSERS                               |                                                                             |                                       |                     |                                                                                                              |                  |
| Model<br>C-score (1.53)                 | 94.02 %                                                                     | 97.52                                 | -7.78               | F=82.5<br>GA= 2.6                                                                                            | AA=14.9<br>D=0.0 |
| RaptorX                                 |                                                                             |                                       |                     |                                                                                                              |                  |
| Model                                   | 94.42 %                                                                     | 81.07                                 | -7.73               | F= 92.1<br>GA=0.0                                                                                            | AA=7.5<br>D=0.4  |
| Phyre2                                  |                                                                             |                                       |                     |                                                                                                              |                  |
| Model                                   | 97.61 %                                                                     | 81.89                                 | -7.56               | F= 85.5<br>GA= 0.4                                                                                           | AA=13.6<br>D=0.4 |
| SWISS-MODEL                             |                                                                             |                                       |                     |                                                                                                              |                  |
| Model                                   | 98.01 %                                                                     | 91.73                                 | -7.83               | F= 88.6<br>GA= 0.0                                                                                           | AA=11<br>D=0.4   |

**Table S1:** Evaluation of 3D structure models of PAC by Verify 3D, ERRAT, ProSAWEB, and Ramachandran Plot. Galaxy model 4 was chosen for refinement process.

| <b>Models</b>                         | <b>Verify3D (%)</b><br>of the residues had<br>an averaged 3D1D<br>score $\geq 0.2$ | <b>ERRAT</b><br>Overall<br>Quality<br>Factor | <b>ProSA-WEB</b><br>ZScore | <b>Ramachandran Plot (%)</b><br>Favored(F)<br>additionally allowed (AA)<br>generously allowed (GA)<br>disallowed(D) |                 |
|---------------------------------------|------------------------------------------------------------------------------------|----------------------------------------------|----------------------------|---------------------------------------------------------------------------------------------------------------------|-----------------|
| GALAXY Model 4<br>(Before refinement) | 98.01%                                                                             | 95.88                                        | -7.61                      | F=94.7<br>GA= 0.0                                                                                                   | AA=4.8<br>D=0.4 |
| GALAXY Model 4<br>(After refinement)  |                                                                                    |                                              |                            |                                                                                                                     |                 |
| Model 1                               | 96.81%                                                                             | 95.43                                        | -7.81                      | F= 93.4<br>GA= 0.0                                                                                                  | AA=6.6<br>D=0.0 |
| Model 2*                              | 98.01%                                                                             | 97.51                                        | -7.74                      | F=93.4<br>GA=0.0                                                                                                    | AA=6.1<br>D=0.4 |
| Model 3                               | 97.61%                                                                             | 93.41                                        | -7.67                      | F=92.5<br>GA= 0.0                                                                                                   | AA=7<br>D=0.4   |
| Model 4                               | 97.61%                                                                             | 94.60                                        | -7.68                      | F= 92.1<br>GA= 0.0                                                                                                  | AA=7.5<br>D=0.4 |
| Model 5                               | 94.82%                                                                             | 95.85                                        | -7.53                      | F= 92.5<br>GA= 0.0                                                                                                  | AA=7.5<br>D=0.0 |
| Model 6                               | 96.81%                                                                             | 94.21                                        | -7.71                      | F=93<br>GA= 0.0                                                                                                     | AA=7<br>D=0.0   |
| Model 7                               | 96.41%                                                                             | 96.26                                        | -7.45                      | F= 92.5<br>GA= 0.0                                                                                                  | AA=7.5<br>D=0.0 |
| Model 8                               | 96.81%                                                                             | 95.83                                        | -7.6                       | F=92.4<br>GA=0.0                                                                                                    | AA=7.9<br>D=0.0 |
| Model 9                               | 96.41%                                                                             | 96.26                                        | -7.74                      | F=93<br>GA=0.0                                                                                                      | AA=7<br>D=0.0   |
| Model 10                              | 96.81%                                                                             | 93.77                                        | -7.47                      | F=92.1<br>GA=0.0                                                                                                    | AA=7.9<br>D=0.0 |

**Table S2:** Validation scores of Galaxy Model after refinement. Selected model 2 of refinement obtained the highest validation score.

| Residue suggestion | Discoptope score Threshold: -3.7 | EPSVR SCORE | SEPPA Score Threshold:0.089 | Ellipro Conformational Score Threshold:0.5 | DEPTH of residue (Å) | OSP of residue | Pseudo $\Delta\Delta G$ of protein | Stability |
|--------------------|----------------------------------|-------------|-----------------------------|--------------------------------------------|----------------------|----------------|------------------------------------|-----------|
| <b>Wild: T82</b>   | <b>-3.58</b>                     | <b>94</b>   | <b>0.190</b>                | <b>0.734</b>                               | <b>3.2</b>           | <b>0.15</b>    | -                                  | -         |
| T82A*              | -4.964                           | 76          | 0.169                       | 0.733                                      | 3.1                  | 0.22           | 0.12                               | ↑         |
| T82V               | -4.781                           | 81.00       | 0.277                       | 0.734                                      | 3.1                  | 0.17           | 0.07                               | ↑         |
| T82L               | -5.246                           | 91.00       | 0.278                       | 0.732                                      | 3.3                  | 0.13           | 0.5                                | ↑         |
| <b>Wild: T100</b>  | <b>-3.376</b>                    | <b>90</b>   | <b>0.223</b>                | <b>0.734</b>                               | <b>3.4</b>           | <b>0.19</b>    | -                                  | -         |
| T100A*             | -4.4                             | 86.00       | 0.337                       | 0.732                                      | 3.1                  | 0.2            | 0.35                               | ↑         |
| T100V              | -4.707                           | 84.00       | 0.471                       | 0.732                                      | 3.4                  | 0.16           | 0.42                               | ↑         |
| T100L              | -4.793                           | 85.00       | 0.467                       | 0.734                                      | 3.3                  | 0.18           | 0.85                               | ↑         |
| <b>Wild: D101</b>  | <b>-2.414</b>                    | <b>90</b>   | <b>0.247</b>                | <b>0.734</b>                               | <b>3.3</b>           | <b>0.11</b>    | -                                  | -         |
| D101A              | -4.331                           | 89.00       | 0.311                       | 0.735                                      | 3.2                  | 0.08           | -0.21                              | ↓         |
| D101V*             | -4.331                           | 82.00       | 0.260                       | 0.735                                      | 3.3                  | 0.1            | -0.26                              | ↓         |
| D101L              | -4.769                           | 92.00       | 0.322                       | 0.735                                      | 3.2                  | 0.06           | 0.2                                | ↑         |
| <b>Wild: Q121</b>  | <b>-1.651</b>                    | <b>87</b>   | <b>0.088</b>                | <b>0.572</b>                               | <b>3.4</b>           | <b>0.12</b>    | -                                  | -         |
| Q121A*             | -3.963                           | 67.00       | 0.046                       | 0.567                                      | 3                    | 0.13           | 0.24                               | ↑         |
| Q121V              | -3.921                           | 64.00       | 0.080                       | 0.568                                      | 3.2                  | 0.15           | 0.22                               | ↑         |
| Q121L              | -4.24                            | 69.00       | 0.080                       | 0.572                                      | 3.2                  | 0.1            | 0.56                               | ↑         |
| <b>Wild: N146</b>  | <b>-2.539</b>                    | <b>96</b>   | <b>0.234</b>                | <b>0.713</b>                               | <b>3.2</b>           | <b>0.15</b>    | -                                  | -         |
| N146A              | -4.97                            | 78.00       | 0.199                       | 0.723                                      | 3                    | 0.2            | 0.03                               | ↑         |
| N146V*             | -5.225                           | 75.00       | 0.200                       | 0.723                                      | 3.2                  | 0.17           | 0.02                               | ↑         |
| N146L              | -5.226                           | 90.00       | 0.203                       | 0.724                                      | 3.2                  | 0.14           | 0.25                               | ↑         |
| <b>Wild: D147</b>  | <b>-3.658</b>                    | <b>98</b>   | <b>0.075</b>                | <b>0.758</b>                               | <b>3.5</b>           | <b>0.37</b>    | -                                  | -         |
| D147A*             | -5.852                           | 96.00       | 0.063                       | 0.722                                      | 3.5                  | 0.34           | 0.15                               | ↑         |
| D147V              | -5.648                           | 96.00       | 0.055                       | 0.724                                      | 3.6                  | 0.31           | 0.02                               | ↑         |
| D147L              | -6.012                           | 98.00       | 0.055                       | 0.723                                      | 3.5                  | 0.37           | 0.12                               | ↑         |
| <b>Wild: R149</b>  | <b>-3.654</b>                    | <b>94</b>   | <b>0.073</b>                | <b>0.758</b>                               | <b>3.6</b>           | <b>0.28</b>    | -                                  | -         |
| R149A*             | -6.155                           | 88.00       | 0.051                       | 0.654                                      | 3.1                  | 0.41           | 0.41                               | ↑         |
| R149V              | -6.376                           | 92.00       | 0.050                       | 0.654                                      | 3.4                  | 0.41           | -0.33                              | ↓         |
| R149L              | -6.394                           | 91.00       | 0.050                       | 0.62                                       | 3.7                  | 0.34           | 0.39                               | ↑         |

**Table S3:** Conformational B cell epitope scores and SDM2 results of all potential mutants.

| <b>Models</b> | <b>Verify3D (%)</b><br>of the residues had<br>an averaged 3D1D<br>score $\geq 0.2$ | <b>ERRAT</b><br>Overall Quality<br>Factor | <b>ProSA-WEB</b><br>ZScore | <b>Ramachandran Plot (%)</b><br>Favored(F)<br>additionally allowed (AA)<br>generously allowed (GA)<br>disallowed(D) |
|---------------|------------------------------------------------------------------------------------|-------------------------------------------|----------------------------|---------------------------------------------------------------------------------------------------------------------|
| PAC wild type | 98.01%                                                                             | 97.51                                     | -7.74                      | F=93.4 AA=6.1<br>GA=0.0 D=0.4                                                                                       |
| PAC Mutants   |                                                                                    |                                           |                            |                                                                                                                     |
| T82A          | 98.01%                                                                             | 97.51                                     | -7.57                      | F=93.4 AA=6.1<br>GA=0.0 D=0.4                                                                                       |
| T100A         | 98.01%                                                                             | 97.51                                     | -7.63                      | F=93.4 AA=6.1<br>GA=0.0 D=0.4                                                                                       |
| D101V         | 98.01%                                                                             | 95.85                                     | -7.54                      | F=93.4 AA=6.6<br>GA=0.0 D=0.4                                                                                       |
| Q121A         | 98.01%                                                                             | 97.51                                     | -7.71                      | F=93.4 AA=6.1<br>GA=0.0 D=0.4                                                                                       |
| N146V         | 98.01%                                                                             | 97.51                                     | -7.68                      | F=93.4 AA=6.1<br>GA=0.0 D=0.4                                                                                       |
| D147A         | 98.01%                                                                             | 97.51                                     | -7.69                      | F=93.4 AA=6.1<br>GA=0.0 D=0.4                                                                                       |
| R149A         | 98.01%                                                                             | 97.51                                     | -7.73                      | F=93.4 AA=6.1<br>GA=0.0 D=0.4                                                                                       |

**Table S4:** Validation scores of wild type and mutants form of PAC. Mutant models were obtained from SDM2 server.

| <b>Galaxy server</b> | <b>Verify3D (%)</b><br>of the residues had<br>an averaged 3D1D<br>score $\geq 0.2$ | <b>ERRAT</b><br>Overall<br>Quality<br>Factor | <b>ProSA-WEB</b><br>ZScore | <b>Ramachandran Plot (%)</b><br>Favored(F)<br>additionally allowed (AA)<br>generously allowed (GA)<br>disallowed(D) |                   |
|----------------------|------------------------------------------------------------------------------------|----------------------------------------------|----------------------------|---------------------------------------------------------------------------------------------------------------------|-------------------|
| PAM                  |                                                                                    |                                              |                            |                                                                                                                     |                   |
| Model 1*             | 98.01 %                                                                            | 97.10                                        | -6.95                      | F= 93.4<br>GA= 0.0                                                                                                  | AA= 6.1<br>D= 0.4 |
| Model 2              | 97.61 %                                                                            | 94.65                                        | -7.01                      | F= 93.4<br>GA= 0.0                                                                                                  | AA= 6.1<br>D= 0.4 |
| Model 3              | 94.02 %                                                                            | 97.52                                        | -6.93                      | F= 93<br>GA= 0.0                                                                                                    | AA=6.6<br>D= 0.4  |
| Model 4              | 98.41 %                                                                            | 96.70                                        | -7.02                      | F= 92.5<br>GA= 0.0                                                                                                  | AA= 7<br>D= 0.4   |
| Model 5              | 97.61 %                                                                            | 97.11                                        | -6.91                      | F= 92.5<br>GA= 0.0                                                                                                  | AA= 7<br>D= 0.4   |

**Table S5:** Evaluation of 3D structure of a pulchellin containing all mutations model with Verify 3D, ERRAT, ProSAWEB, and Ramachandran Plot.

| <b>Galaxy server</b>            | <b>Verify3D (%)</b><br>of the residues had<br>an averaged 3D1D<br>score $\geq 0.2$ | <b>ERRAT</b><br>Overall<br>Quality<br>Factor | <b>ProSA-WEB</b><br>ZScore | <b>Ramachandran Plot (%)</b><br>Favored(F)<br>additionally allowed (AA)<br>generously allowed (GA)<br>disallowed(D) |                   |
|---------------------------------|------------------------------------------------------------------------------------|----------------------------------------------|----------------------------|---------------------------------------------------------------------------------------------------------------------|-------------------|
| PAM model 1 (Before refinement) | 98.01 %                                                                            | 97.10                                        | -6.95                      | F= 93.4<br>GA= 0.0                                                                                                  | AA= 6.1<br>D= 0.4 |
| PAM model 1 (After refinement)  |                                                                                    |                                              |                            |                                                                                                                     |                   |
| Model 1                         | 94.42%                                                                             | 98.75                                        | -7.15                      | F= 94.3<br>GA= 0.0                                                                                                  | AA=5.7<br>D=0.0   |
| Model 2                         | 97.61%                                                                             | 98.34                                        | -7.17                      | F= 94.7<br>GA= 0.0                                                                                                  | AA=5.3<br>D=0.0   |
| Model 3*                        | 98.41                                                                              | 97.09                                        | -7.15                      | F=94.7<br>GA= 0.0                                                                                                   | AA=5.3<br>D=0.0   |
| Model 4                         | 96.02%                                                                             | 98.34                                        | -7.09                      | F= 93.9<br>GA= 0.0                                                                                                  | AA=6.1<br>D=0.0   |
| Model 5                         | 97.61%                                                                             | 96.69                                        | -6.98                      | F= 93.9<br>GA= 0.0                                                                                                  | AA=6.1<br>D=0.0   |
| Model 6                         | 94.82%                                                                             | 97.92                                        | -7.03                      | F=94.3<br>GA=0.0                                                                                                    | AA=5.7<br>D=0.0   |
| Model 7                         | 96.81%                                                                             | 97.92                                        | -6.93                      | F= 93.9<br>GA= 0.0                                                                                                  | AA= 6.1<br>D=0.0  |
| Model 8                         | 98.01%                                                                             | 97.91                                        | -7.09                      | F= 94.3<br>GA=0.0                                                                                                   | AA=5.7<br>D=0.0   |
| Model 9                         | 94.82%                                                                             | 94.19                                        | -7.15                      | F= 94.7<br>GA= 0.0                                                                                                  | AA= 5.3<br>D=0.0  |
| Model 10                        | 94.42%                                                                             | 98.75                                        | -7.15                      | F=93.0<br>GA= 0.0                                                                                                   | AA=7.0<br>D=0.0   |

**Table S6:** Validation scores of PAM model after refinement. Model 3 of refinement was selected due to the highest validation score.

| Models        | Interaction residues with CGAGAG according to Auto dock Vina                                                                                                                    | Predicted pulchellin interaction residue according to homology to other RIPs |
|---------------|---------------------------------------------------------------------------------------------------------------------------------------------------------------------------------|------------------------------------------------------------------------------|
| PAC wild type | I21-L24-R25-L28-L39-L56-V66-I68-N72-A73-Y74-V75-Y78-G111-S112-Y113-L116-R124-M155-I156-I158-I159-A162-S163-E164-A166-R167-N196-W198-D199-N200-L242-L244                         | N72-Y74-Y113-R124-Q160-E164-R167-E195-N196-W198                              |
| PAC Mutants   |                                                                                                                                                                                 |                                                                              |
| T82A          | N72-Y74-V75-L87-D89-G111-S112-Y113-S114-L116-Q117-S123-R124-I127-A152-M155-I156-I159-E164-E195-N196-W198-D199-N200-S202-L244                                                    | N72-Y74-Y113-R124-Q160-E164-R167-E195-N196-W198                              |
| T100A         | L28-L39-P42-T71-N72-A73-Y74-V75-V76-L87-D89-G111-S112-Y113-L116-R124-I159-S163-E164-R167-Y168-Y170-I171-L194-E195-N196-W198-D199-S202-L242-L244                                 | N72-Y74-Y113-R124-Q160-E164-R167-E195-N196-W198                              |
| D101V         | N72-Y74-V75-V76-D89-D110-G111-S112-Y113-S114-L116-R124-I156-I159-E164-L192-E195-N196-N197-W198-D199-N200-I218                                                                   | N72-Y74-Y113-R124-Q160-E164-R167-E195-N196-W198                              |
| Q121A         | L39-V70-T71-N72-A73-Y74-V76-D89-G111-S112-Y113-S114-L116-R124-I156-I159-E195-N196-N197-W198-D199-N200-L244-F245                                                                 | N72-Y74-Y113-R124-Q160-E164-R167-E195-N196-W198                              |
| N146V         | Y17-F20-R25-L28-V54-L56-V66-N72-A73-Y74-V75-Y78-L87-D89-G111-S112-Y113-L116-R124-L134-M155-I156-I158-I159-Q160-M161-A162-S163-E164-A166-R167-E195-N196-W198-D199-A241-L242-L244 | N72-Y74-Y113-R124-Q160-E164-R167-E195-N196-W198                              |
| D147A         | L24-R25-L28-L39-N72-A73-Y74-V75-L87-D89-G111-S112-Y113-S114-R124-M155-I159-S163-E164-A166-R167-L192-E195-N196-N197-W198-200N-L242-L244                                          | N72-Y74-Y113-R124-Q160-E164-R167-E195-N196-W198                              |
| R149A         | F20-L24-L28-V54-V66-I68-N72-A73-Y74-V75-L87-D89-G111-S112-Y113-S114-I158-I159-A162-S163-E164-A166-R167-Y168-I171-E195-N196-W198-D199-N200-L244                                  | N72-Y74-Y113-R124-Q160-E164-R167-E195-N196-W198                              |
| PAM           | L24-L28-I52-I68-N72-A73-Y74-V75-L87-D89-G111-S112-Y113-S114-L116-M155-I159-S163-E164-A166-R167-Y168-L194-E195-N196-N197-W198-D199-N200-L201-S202-L240                           | N72-Y74-Y113-R124-Q160-E164-R167-E195-N196-W198                              |

**Table S7:** Pulchellin interaction amino acids (wild type and mutants) in the docking process. Residues of active site in N146V contributed the most, while Q121A contributed the least in docking process. Highlight amino acids indicate shared active site residues between homology prediction and molecular docking.
